# Supplementary material for: Construction of 2DE-Patterns of Plasma Proteins: Aspect of Potential Tumor Markers
Source: Preprints.org preprint supplement (doi:10.20944/preprints202207.0208.v1), 2022-07-14
Supplement: Supplementary file 1 [file supplementary]

| N | Protein | Semi-virtual 2DE | 2DE sectional analysis |
| --- | --- | --- | --- |
|  | A1AG1 | 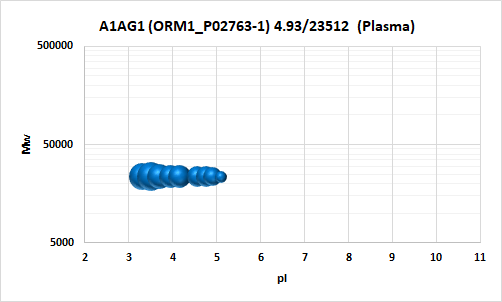 | 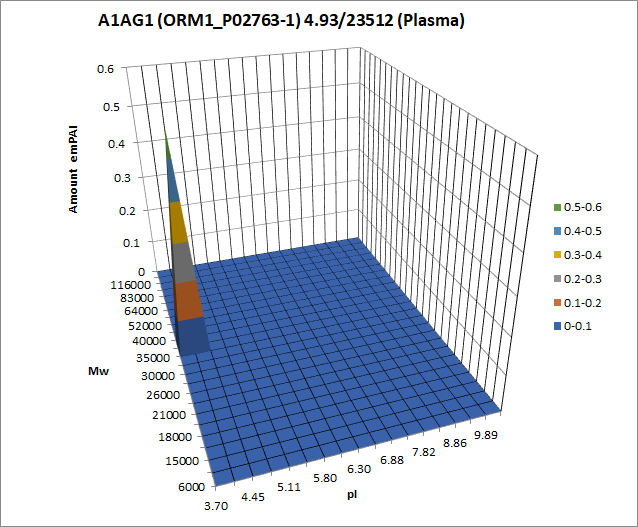 |
|  | A1AG2 | 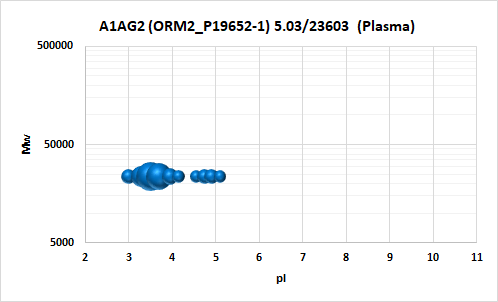 | 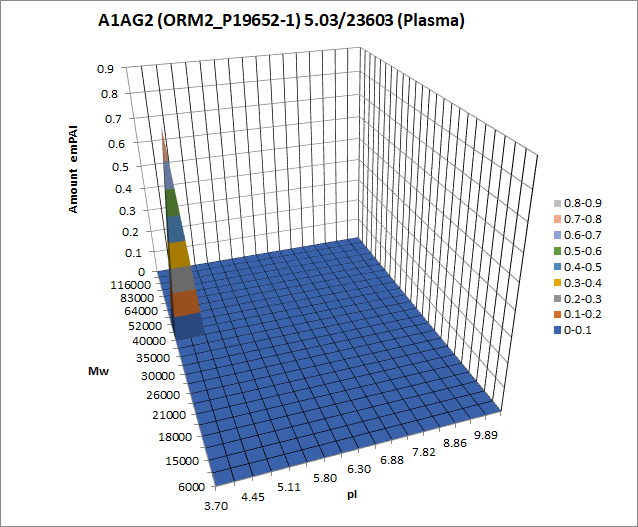 |
|  | A1AT | 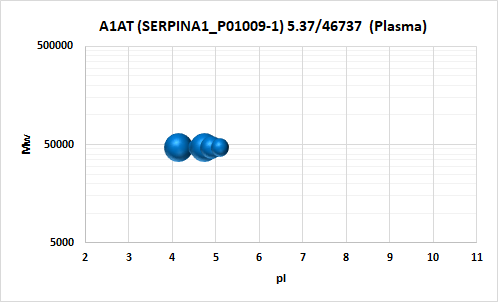 | 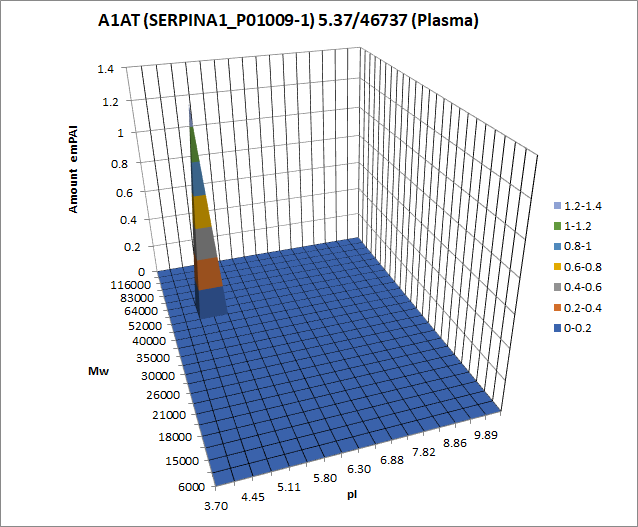 |
|  | A1BG | 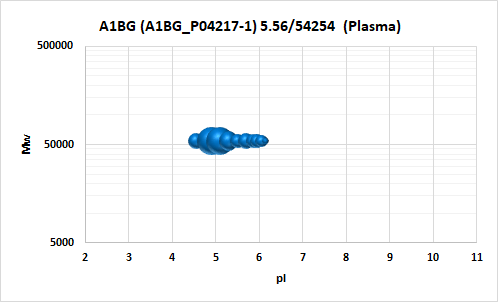 | 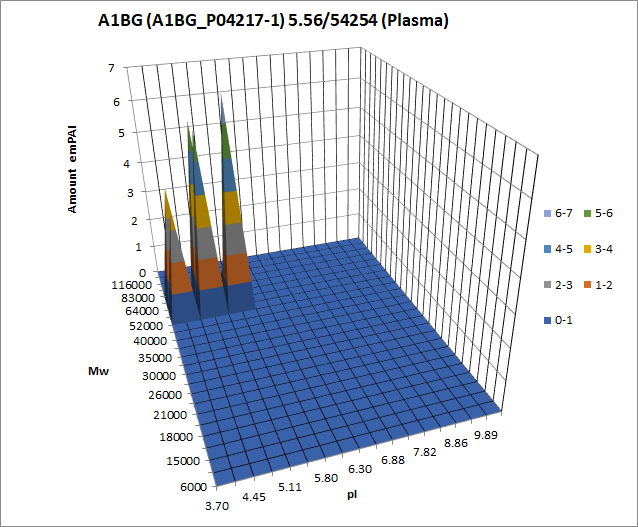 |
|  | A2AP | 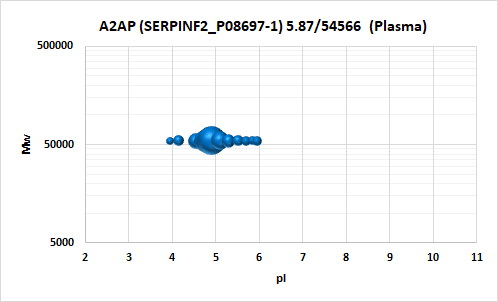 | 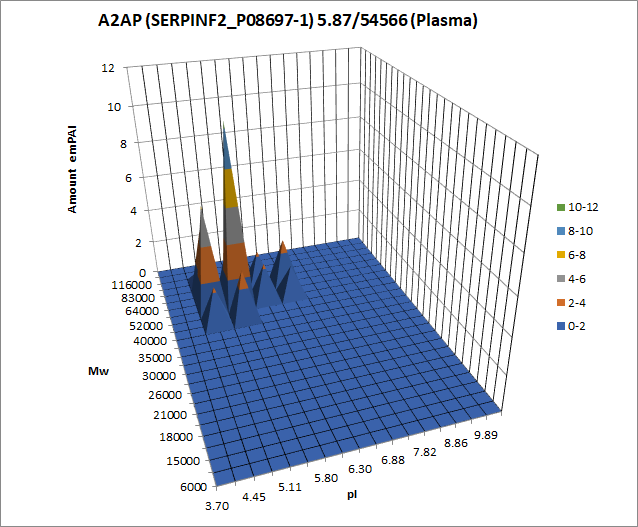 |
|  | A2GL | 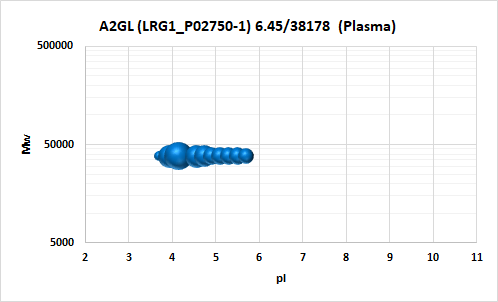 | 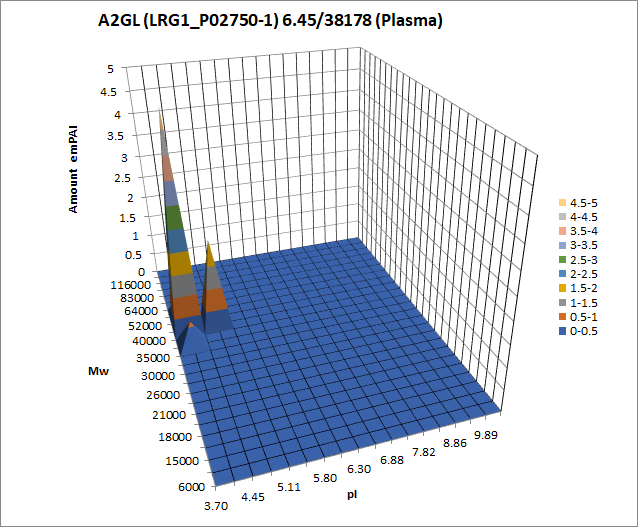 |
|  | A2MG | 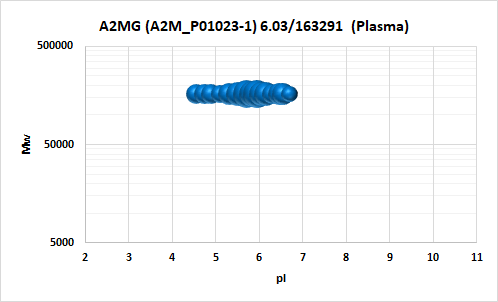 | 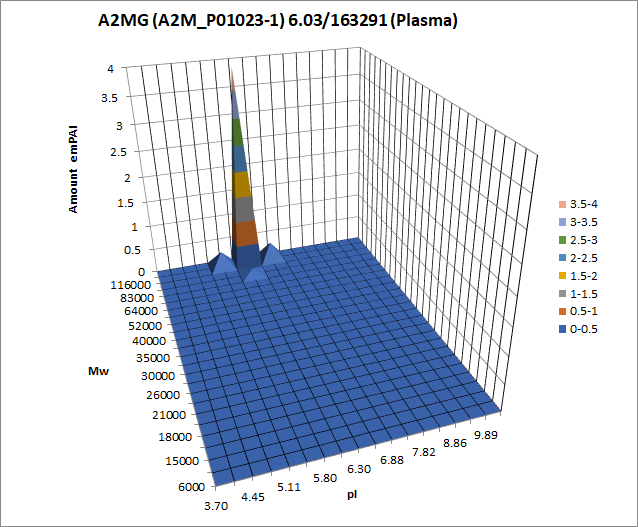 |
|  | AACT | 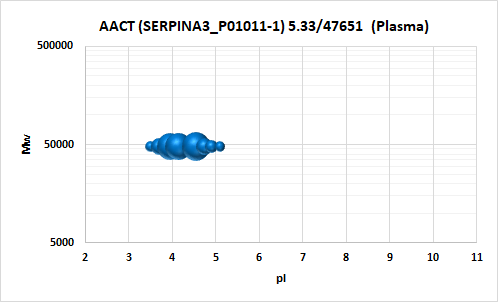 | 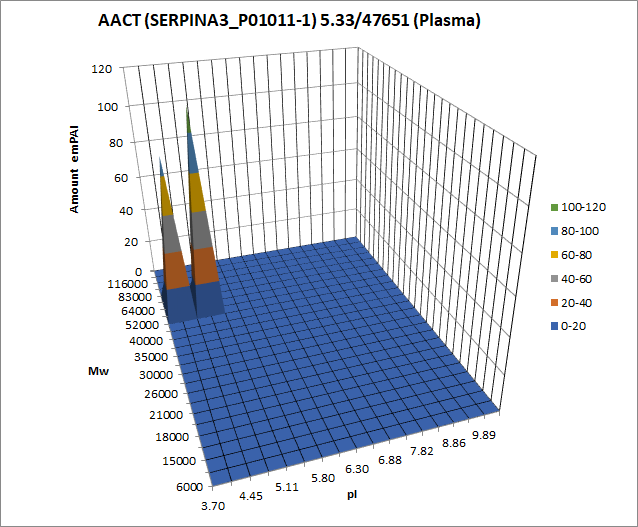 |
|  | ADIPO | 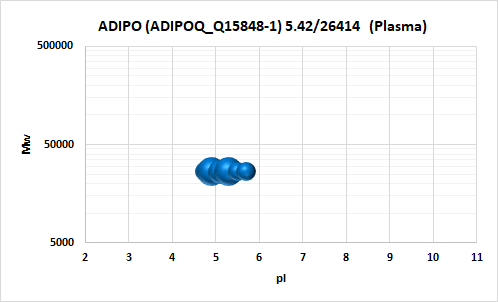 | 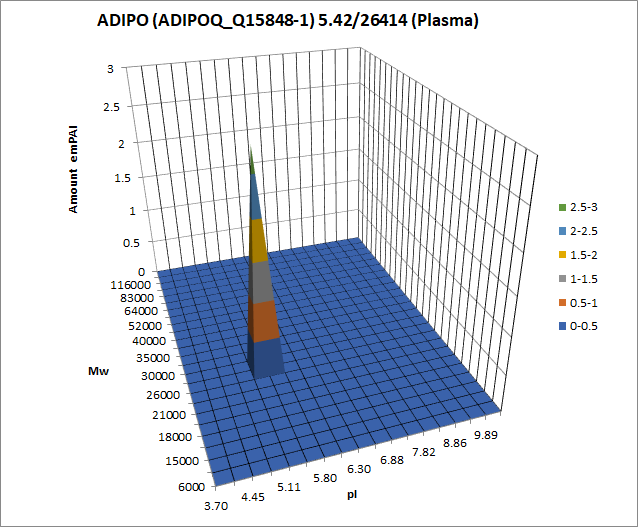 |
|  | AFAM | 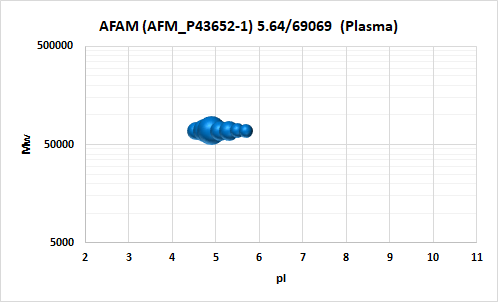 | 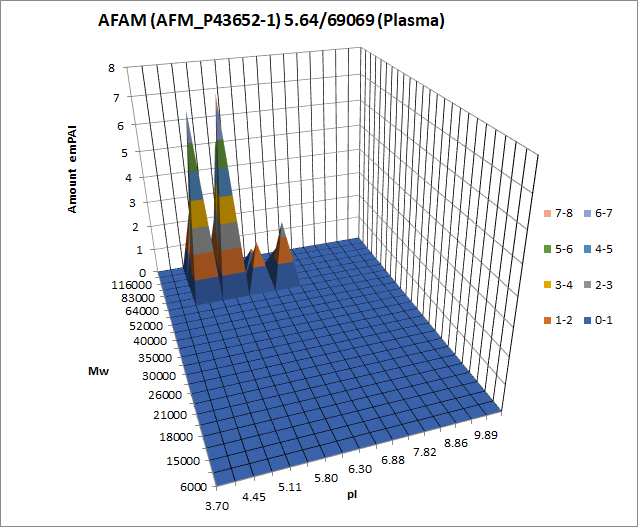 |
|  | ALBU | 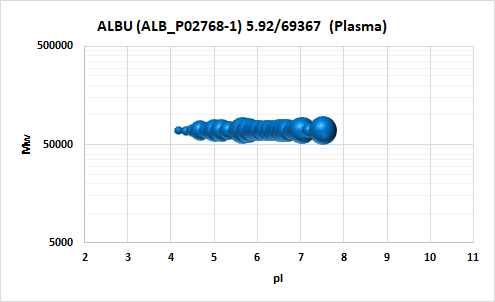 | 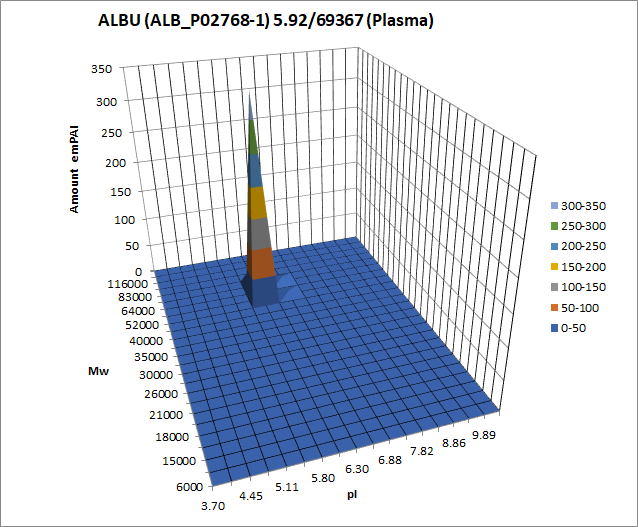 |
|  | AMBP | 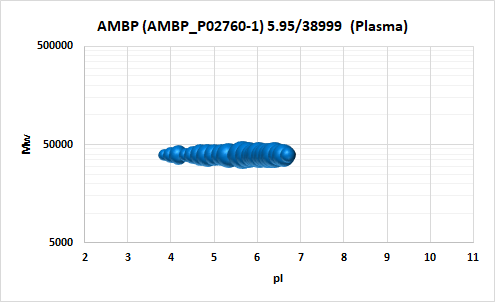 | 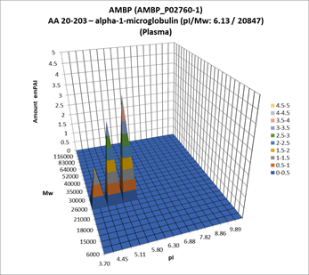 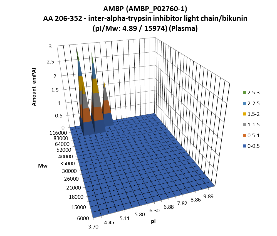 |
|  | ANGT | 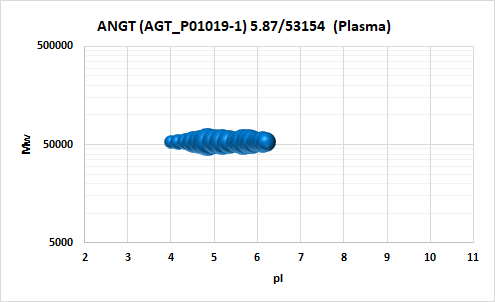 | 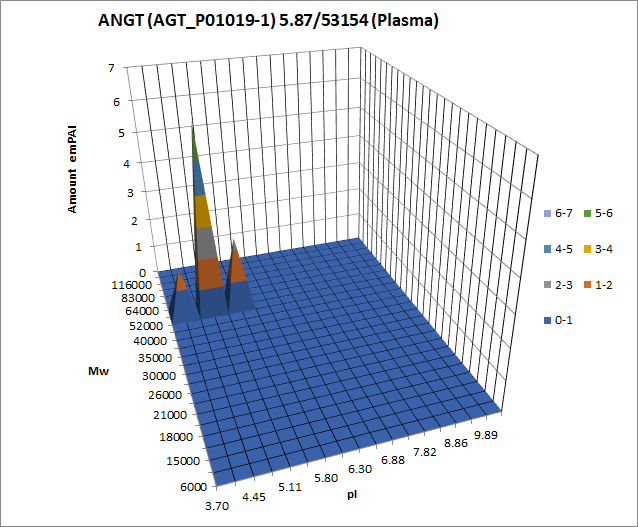 |
|  | ANT3 | 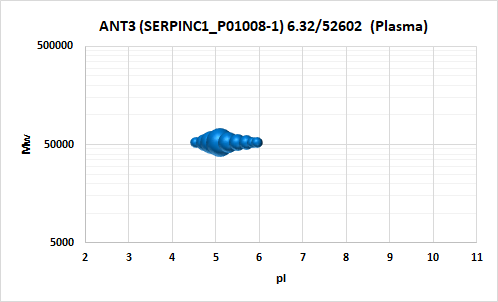 | 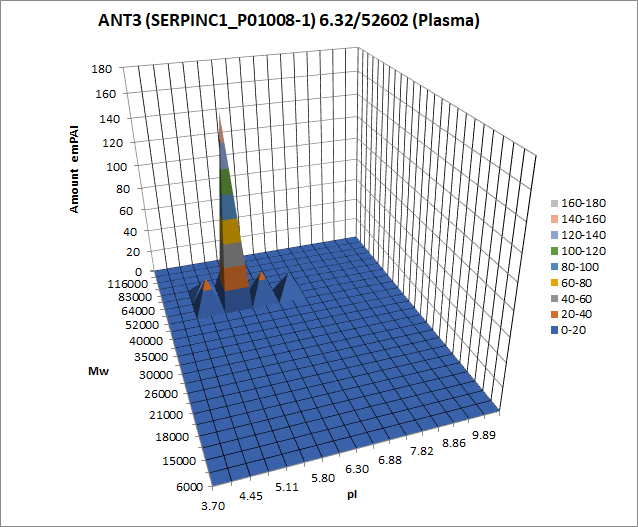 |
|  | APOA1 | 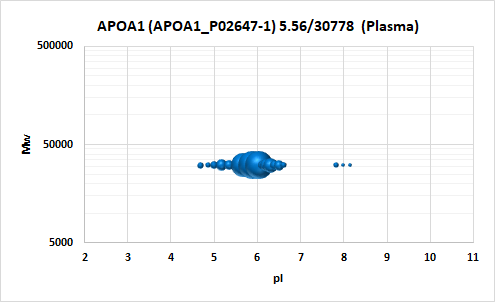 | 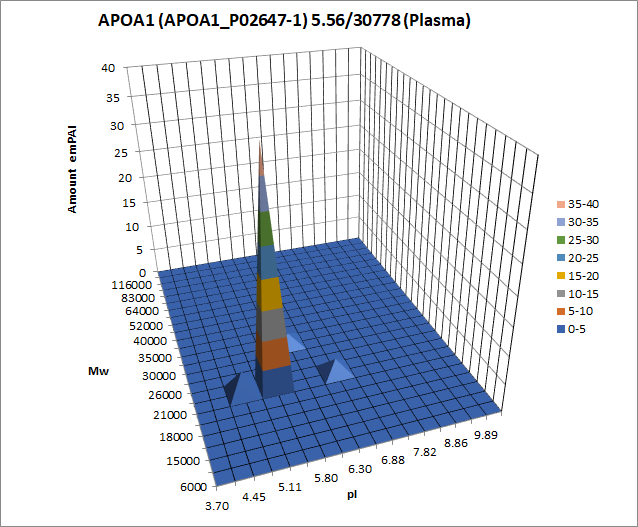 |
|  | APOA2 | 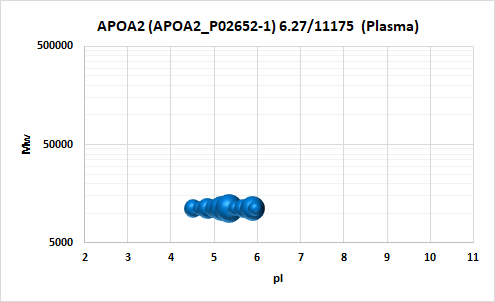 | 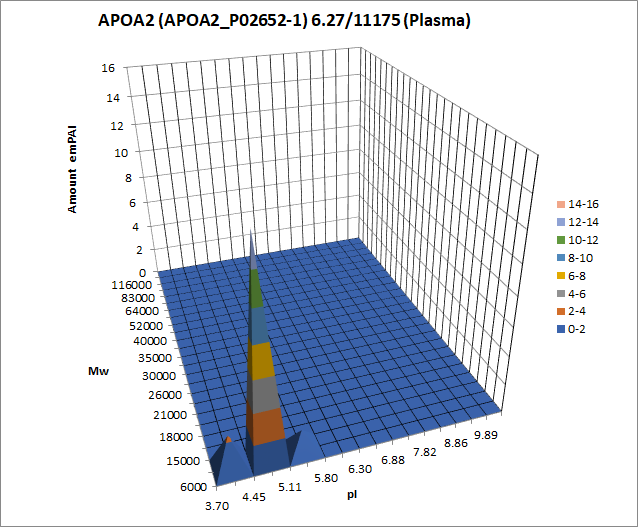 |
|  | APOA4 | 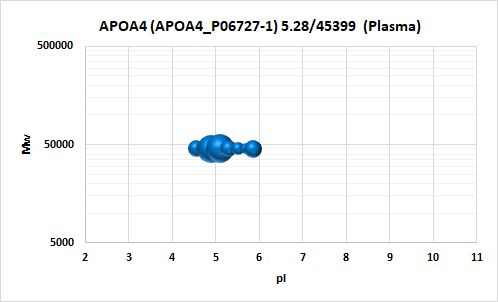 | 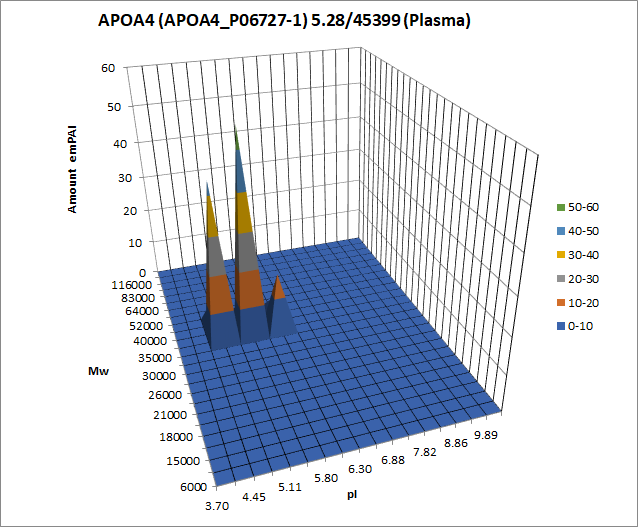 |
|  | APOB | 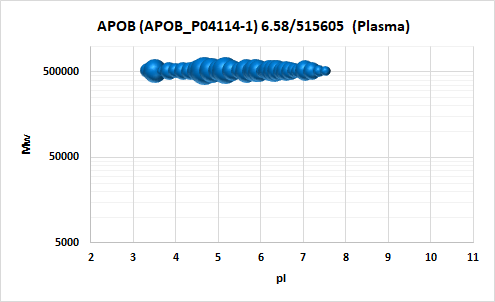 | 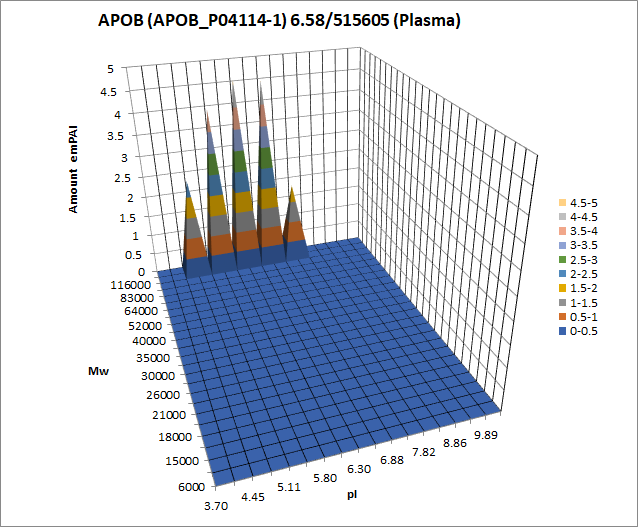 |
|  | APOC1 | 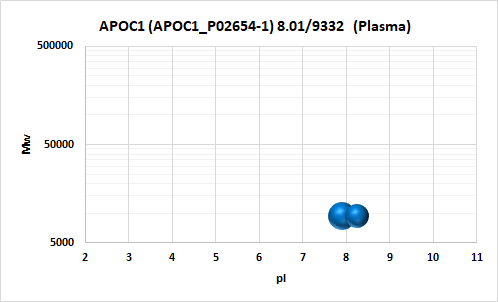 | 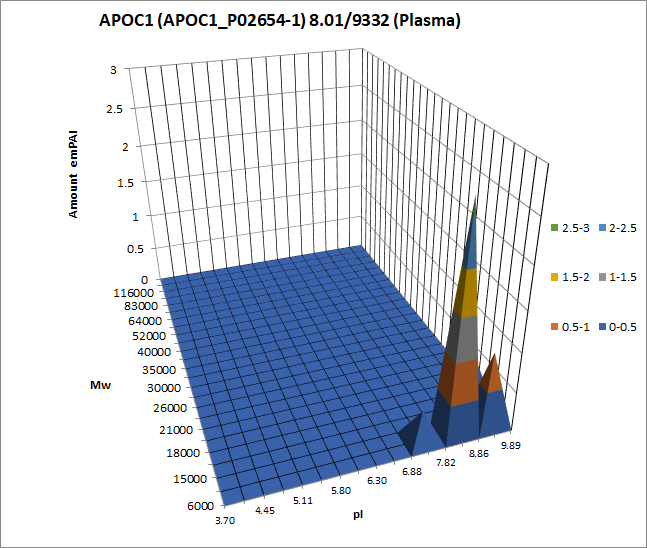 |
|  | APOC2 | 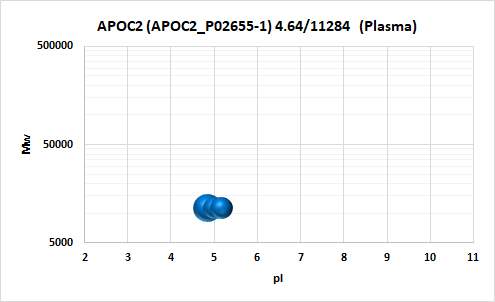 | 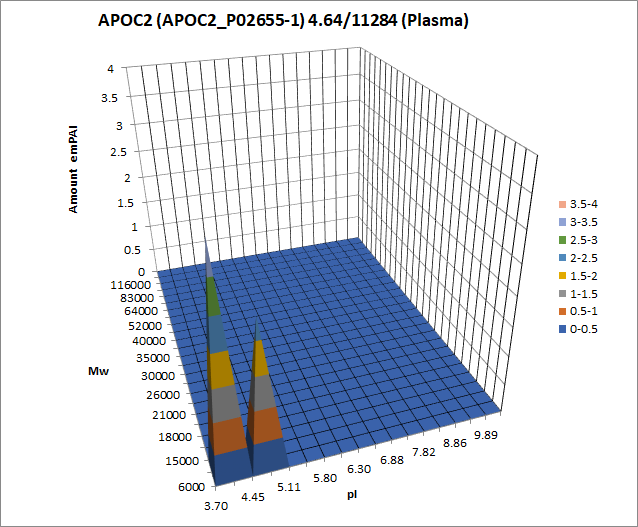 |
|  | APOC3 | 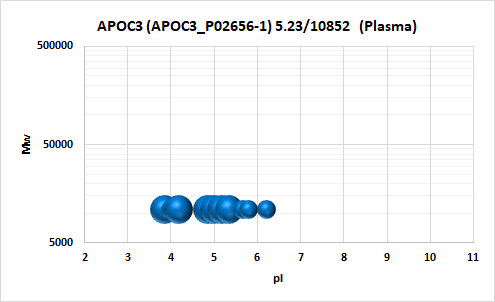 | 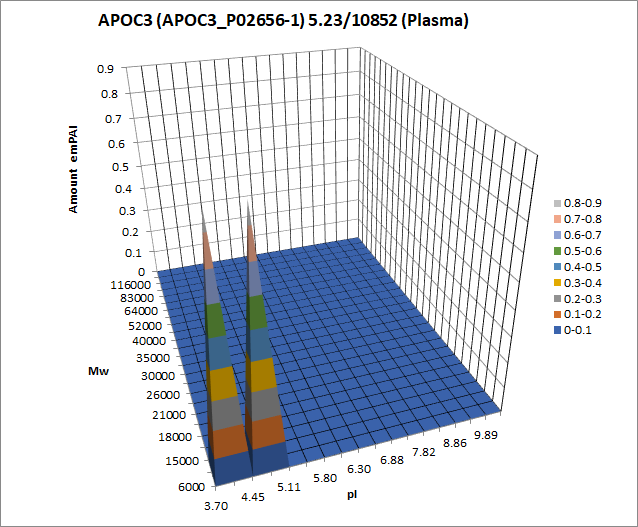 |
|  | APOC4 | 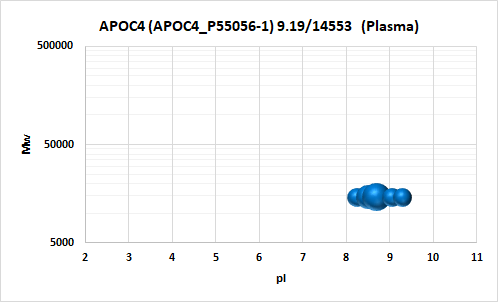 | 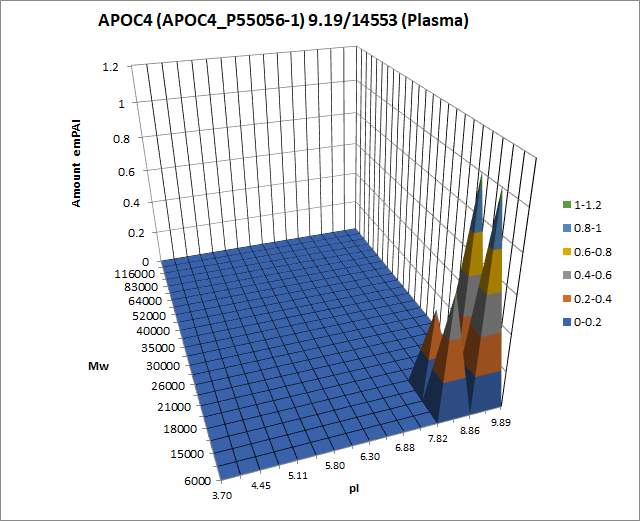 |
|  | APOD | 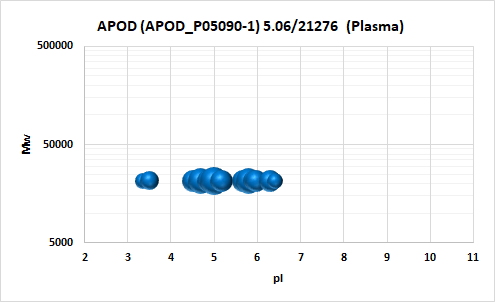 | 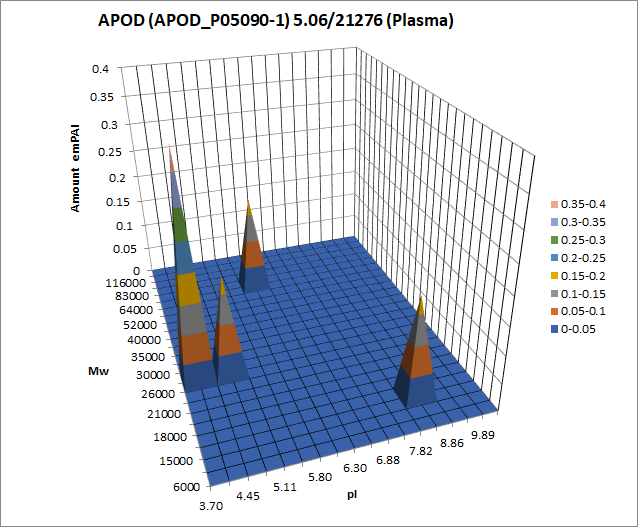 |
|  | APOE | 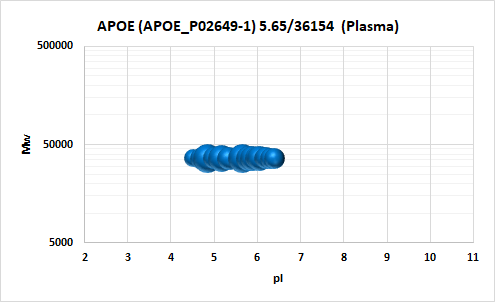 | 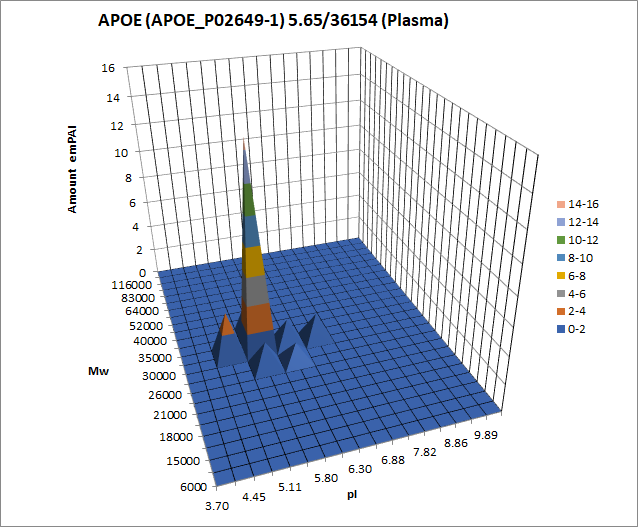 |
|  | APOF | 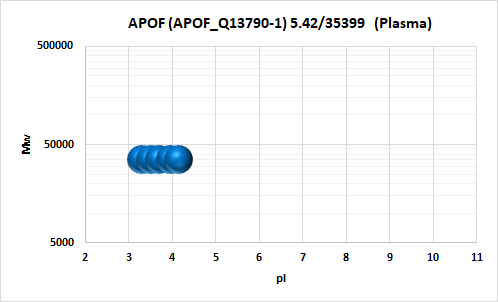 | 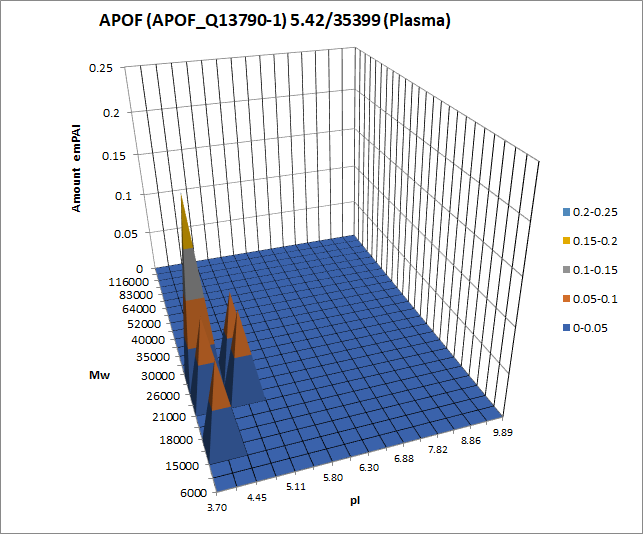 |
|  | APOH | 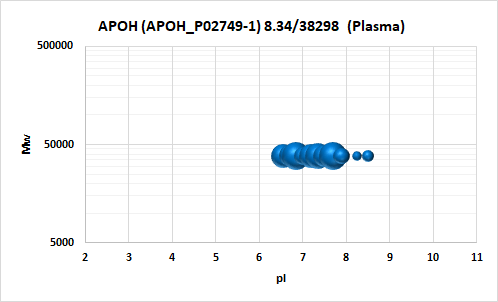 | 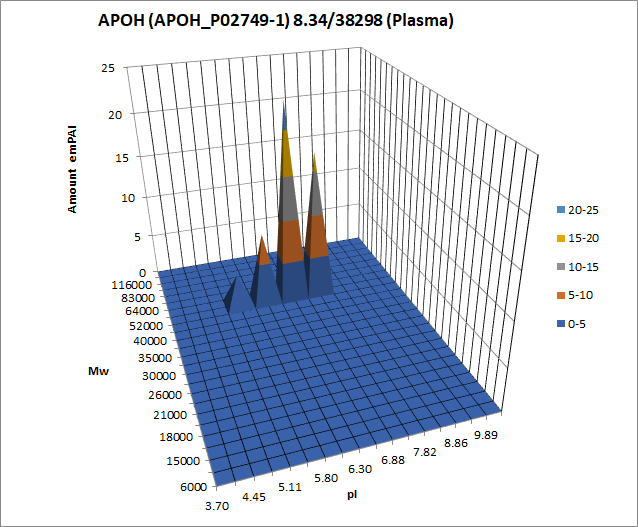 |
|  | APOL1 | 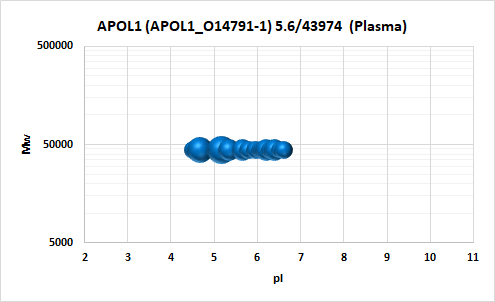 | 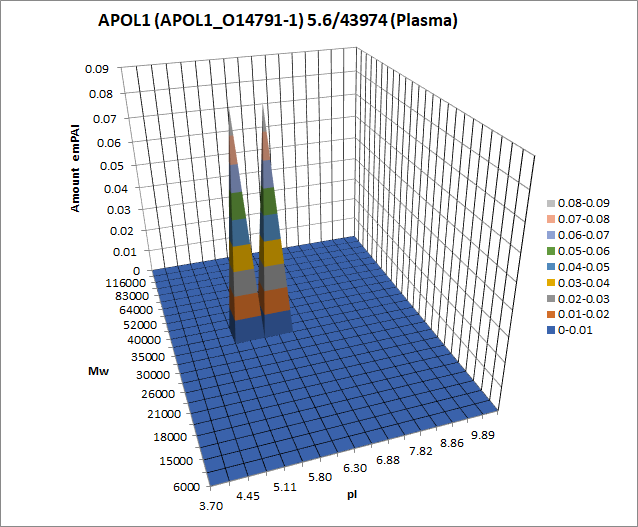 |
|  | APOM | 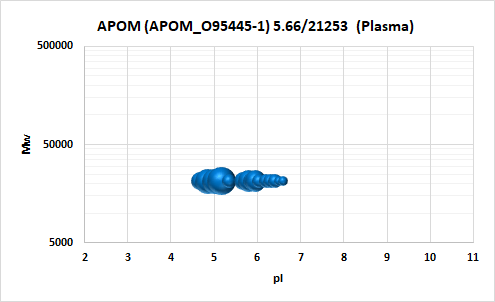 | 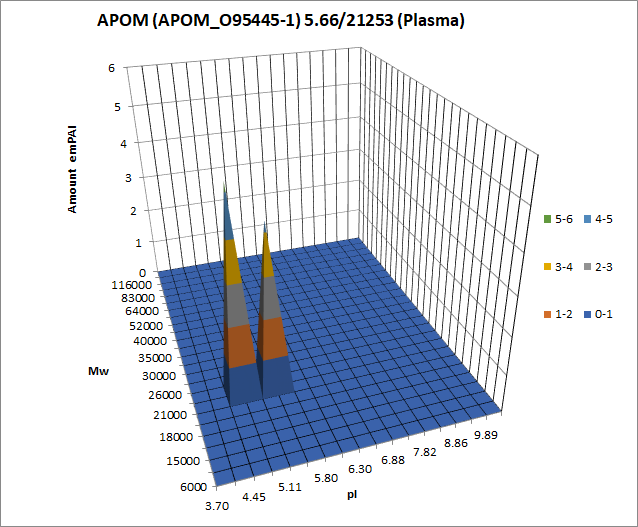 |
|  | C1QA | 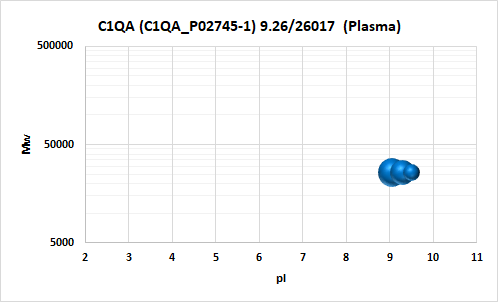 | 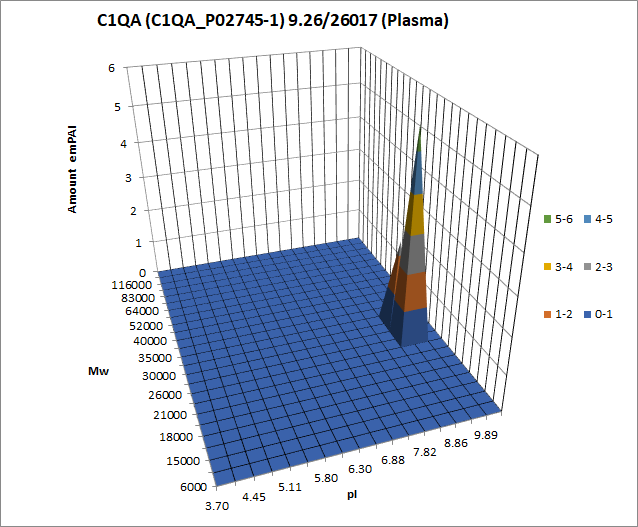 |
|  | C1QB | 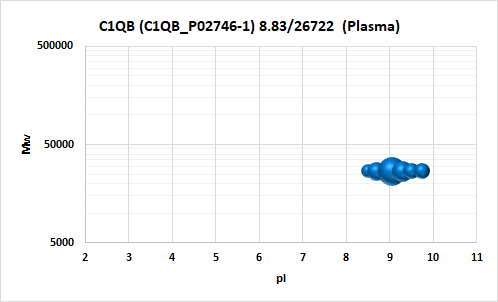 | 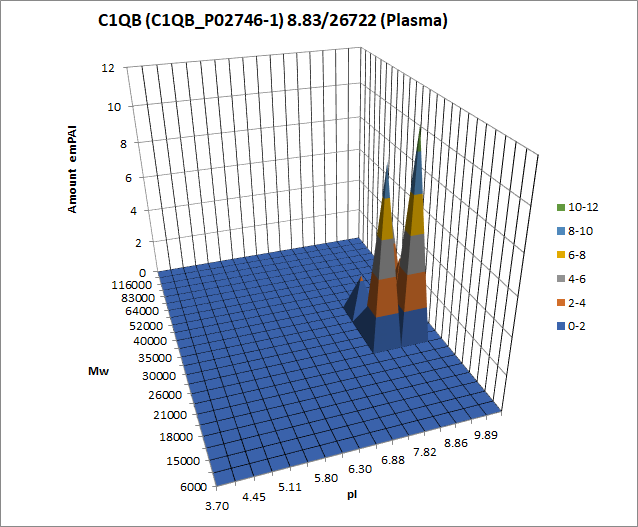 |
|  | C1QC | 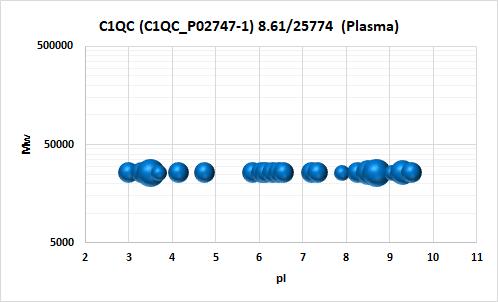 | 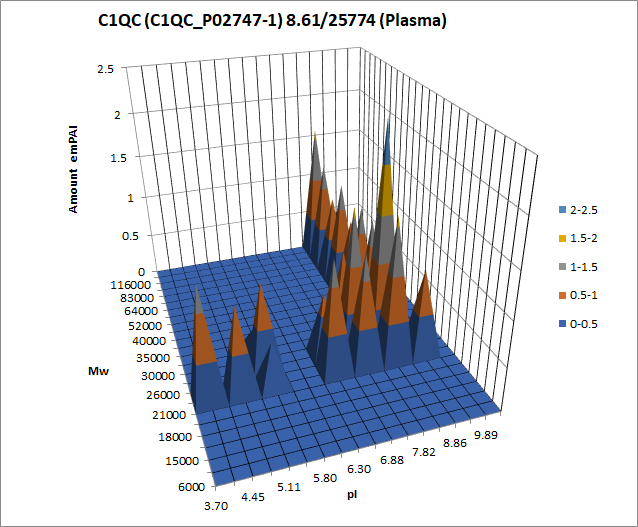 |
|  | C1R | 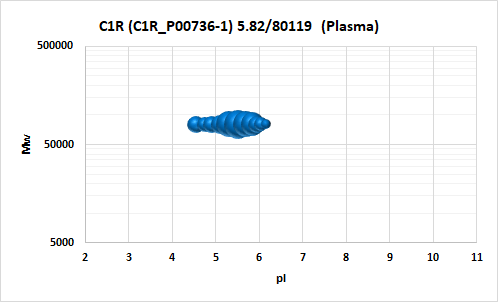 | 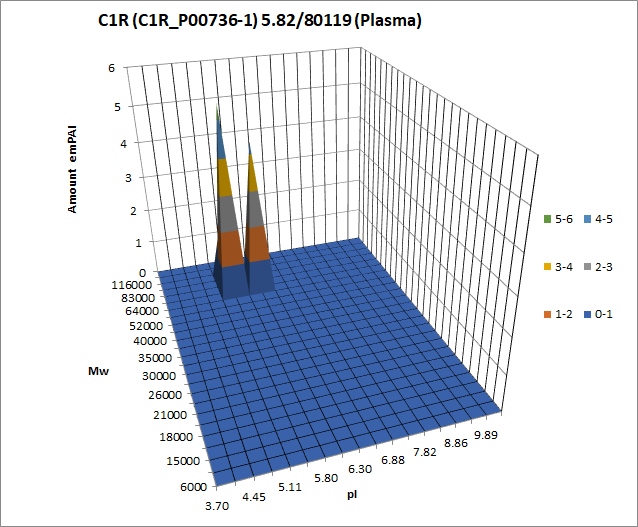 |
|  | C1S | 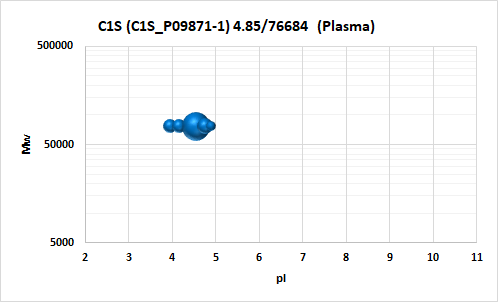 | 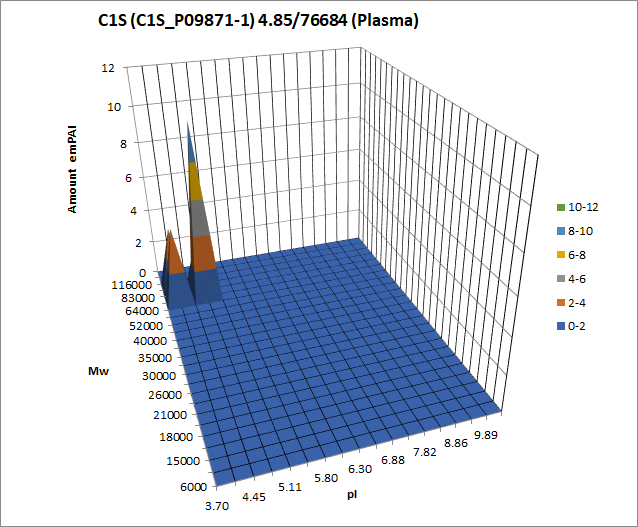 |
|  | C4BPA | 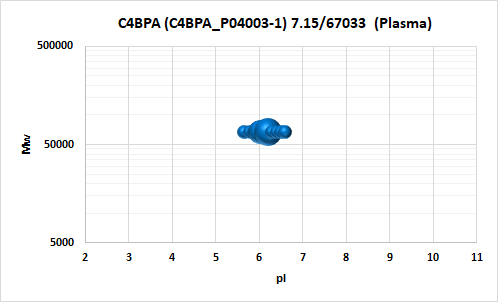 | 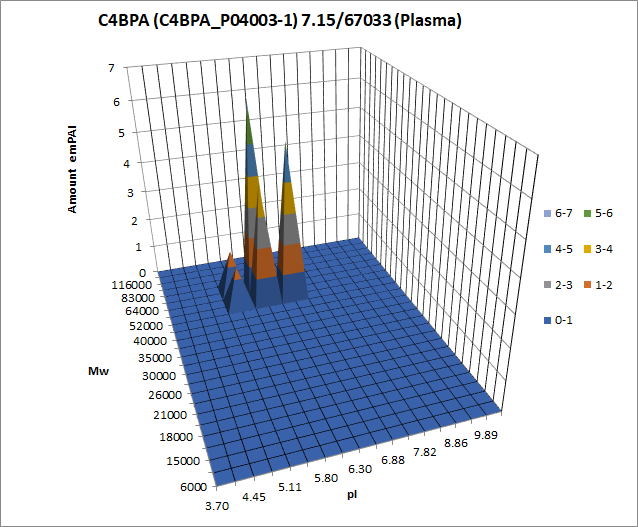 |
|  | CAH1 | 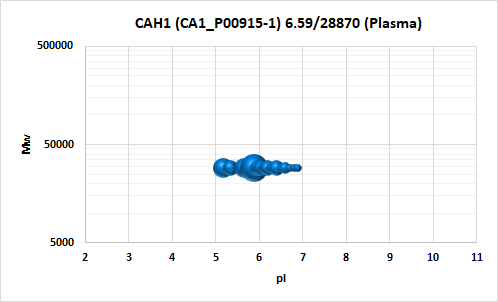 | 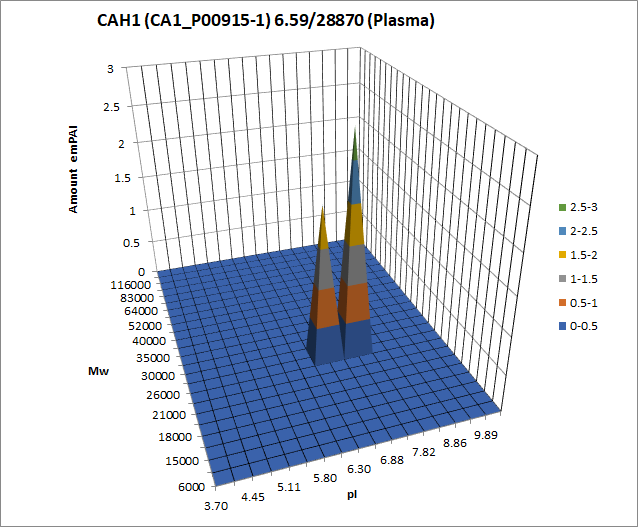 |
|  | CBG | 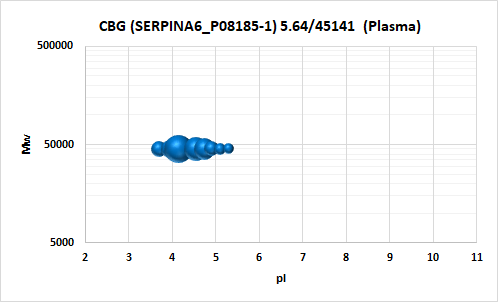 | 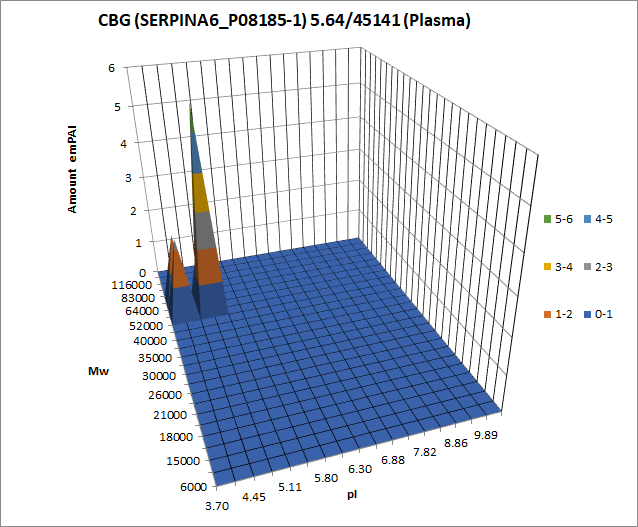 |
|  | CBPN | 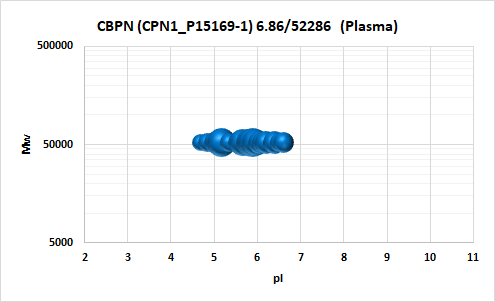 | 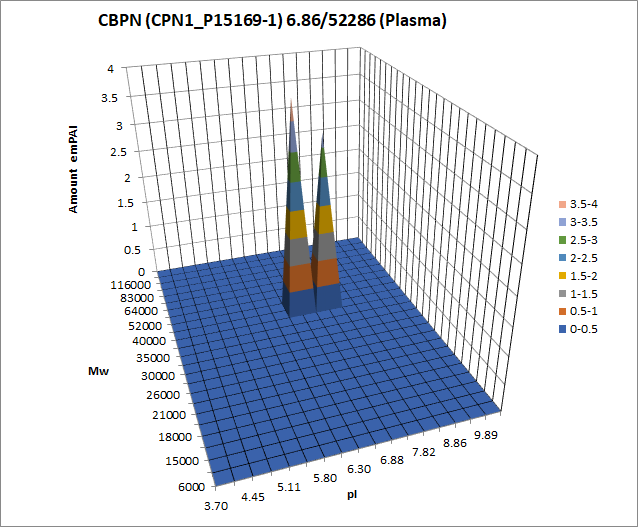 |
|  | CD14 | 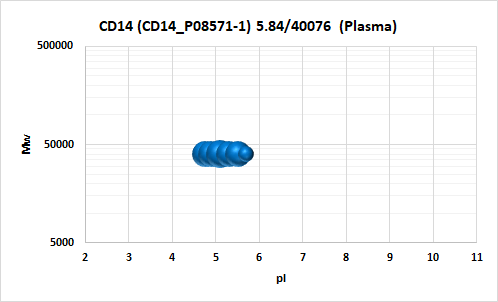 | 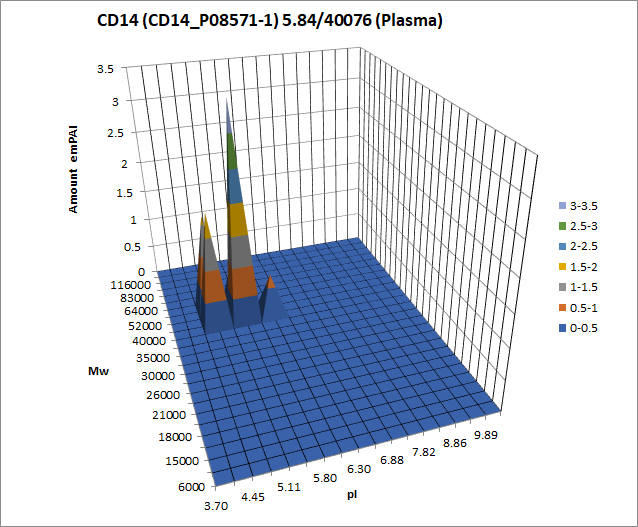 |
|  | CERU | 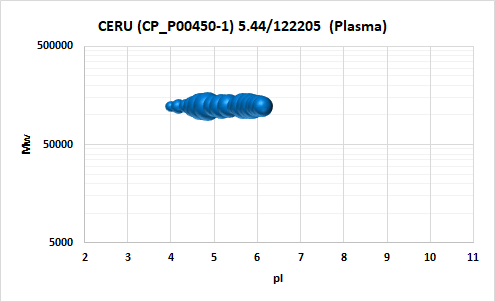 | 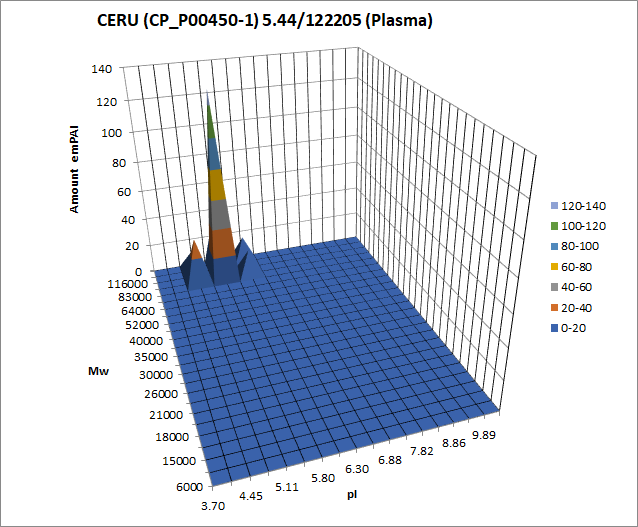 |
|  | CFAB | 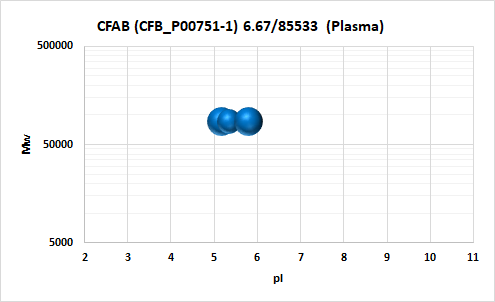 | 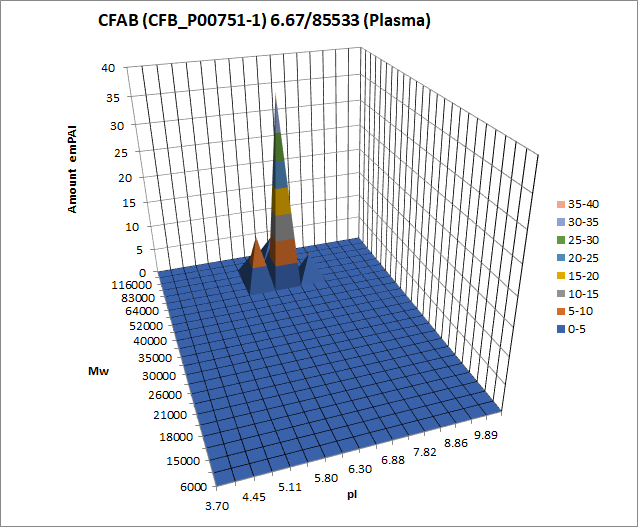 |
|  | CFAD | 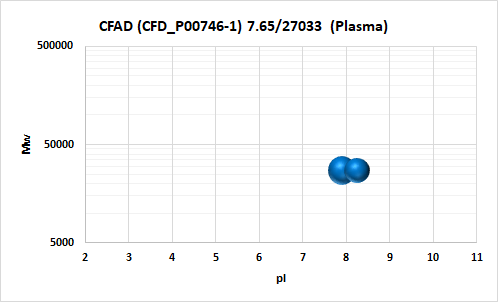 | 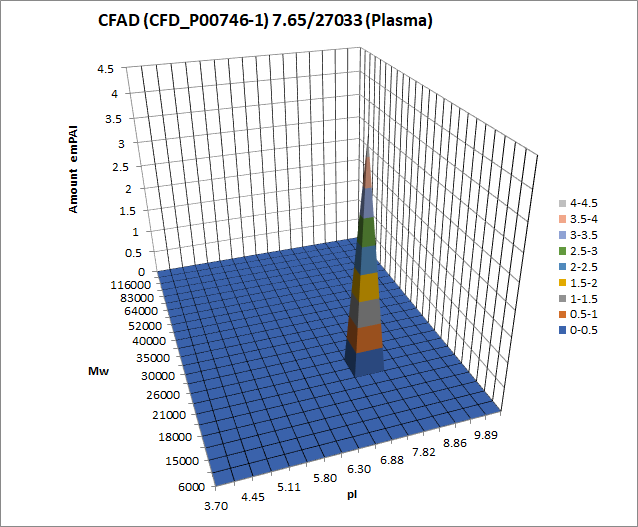 |
|  | CFAH | 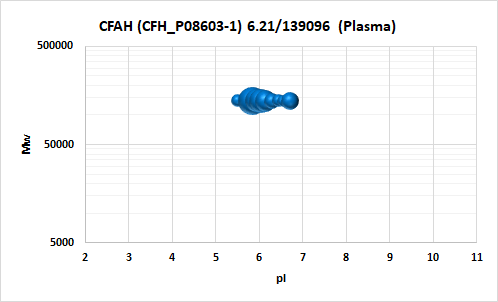 | 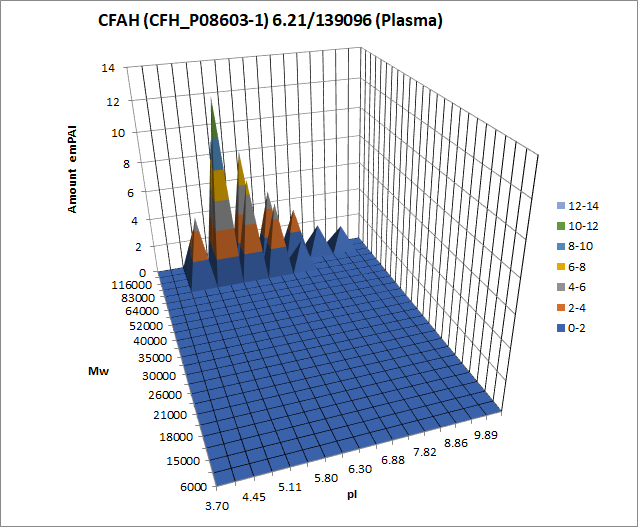 |
|  | CFAI | 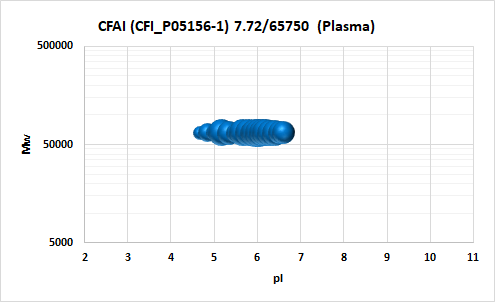 | 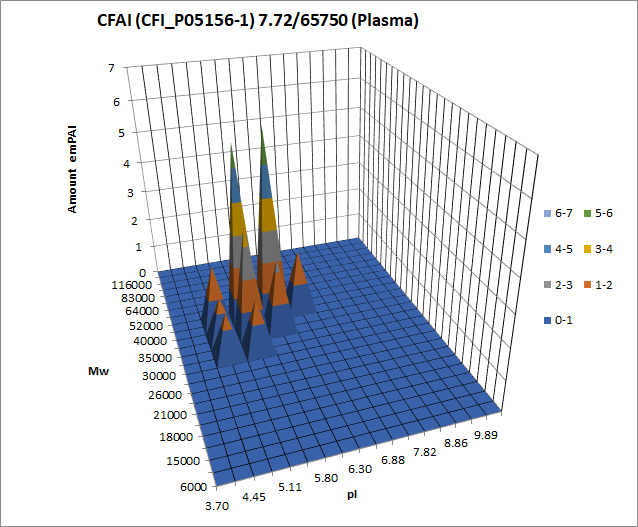 |
|  | CHLE | 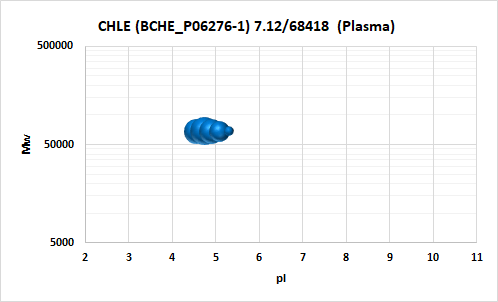 | 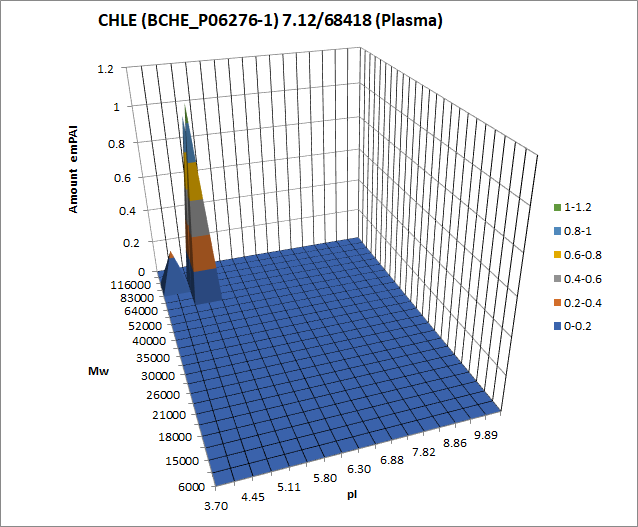 |
|  | CLUS | 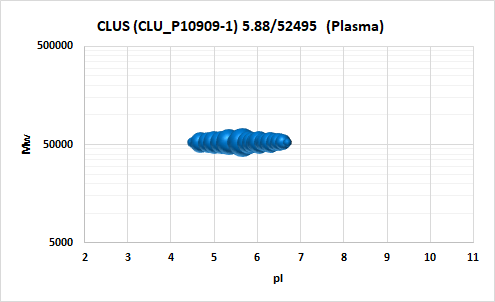 | 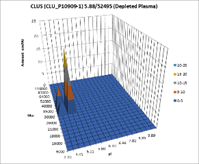 |
|  | CNDP1 | 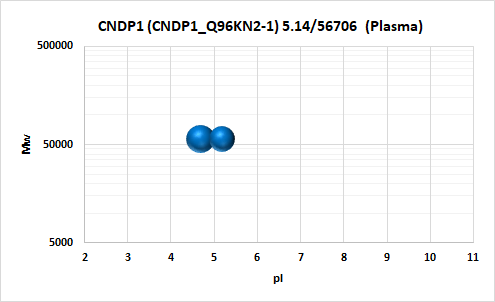 | 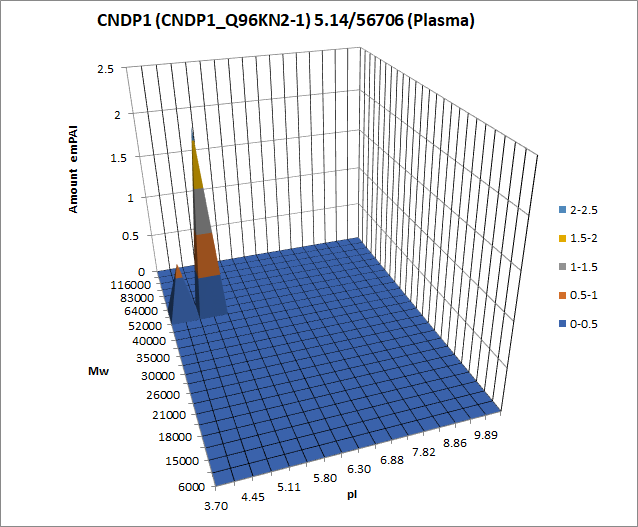 |
|  | CO2 | 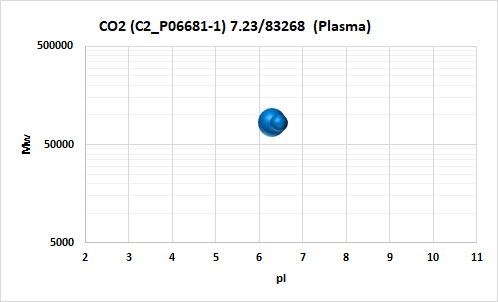 | 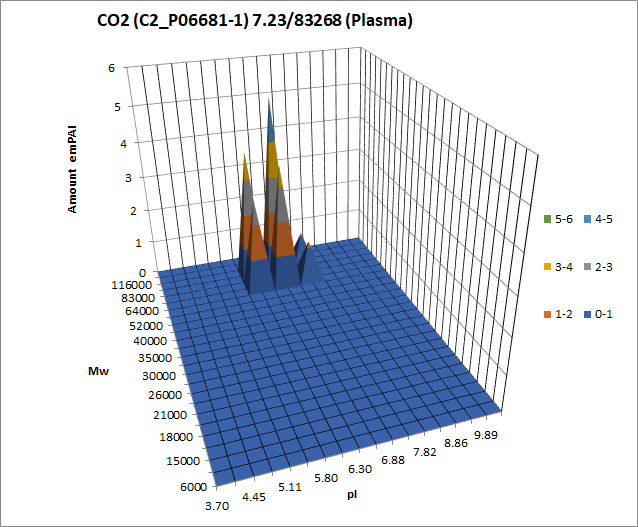 |
|  | CO3 | 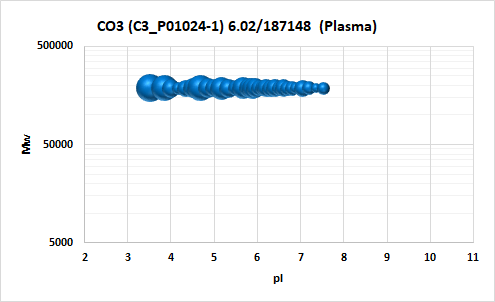 | 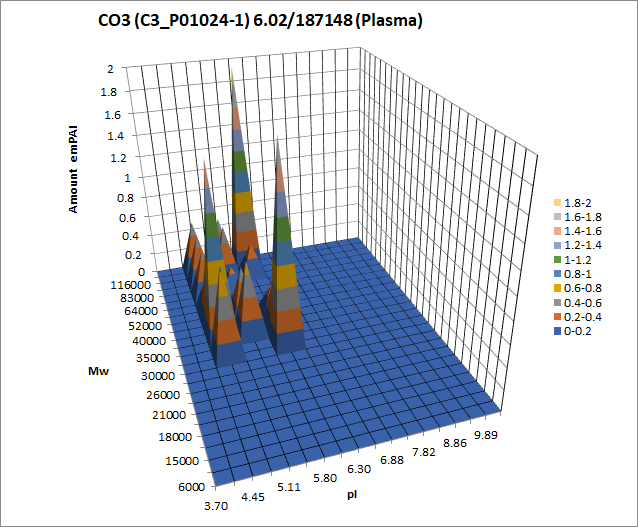 |
|  | CO4A | 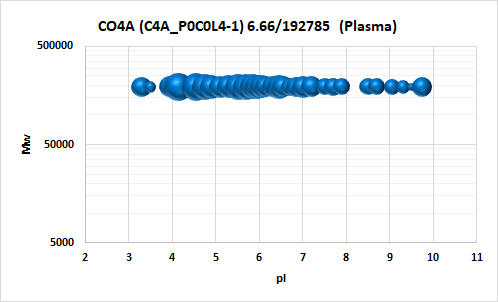 | 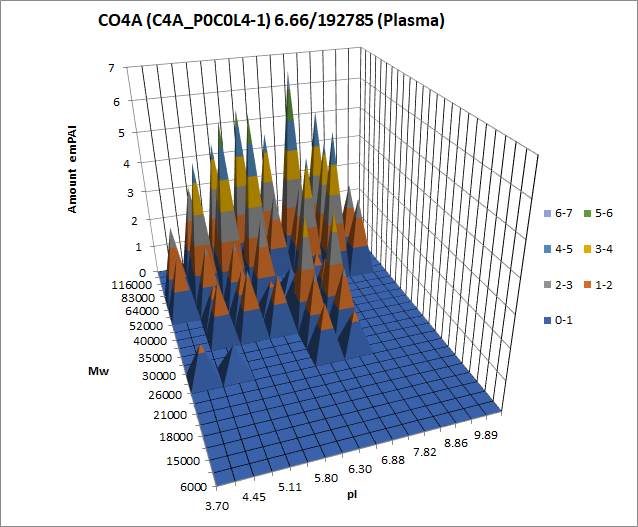 |
|  | CO4B | 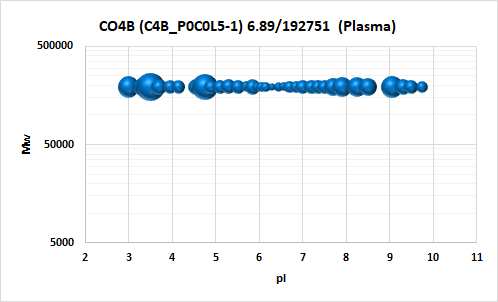 |  |
|  | CO5 |  |  |
|  | CO6 |  |  |
|  | CO7 |  |  |
|  | CO8A |  |  |
|  | CO8B |  |  |
|  | CO8G |  |  |
|  | CO9 |  |  |
|  | CPN2 |  |  |
|  | CRP |  |  |
|  | ECM1 |  |  |
|  | F13B |  |  |
|  | FBLN1 |  |  |
|  | FCN3 |  |  |
|  | FETUA |  |  |
|  | FETUB |  |  |
|  | FIBA |  |  |
|  | FIBB |  |  |
|  | FIBG |  |  |
|  | FINC |  |  |
|  | GELS |  |  |
|  | GPX3 |  |  |
|  | HBA |  |  |
|  | HBB |  |  |
|  | HBD |  |  |
|  | HEMO |  |  |
|  | HEP2 |  |  |
|  | HPT |  |  |
|  | HPT-alpha  HPT-beta |  |  |
|  | HPTR |  |  |
|  | HRG |  |  |
|  | IC1 |  |  |
|  | ITIH1 |  |  |
|  | ITIH2 |  |  |
|  | ITIH3 |  |  |
|  | ITIH4 |  |  |
|  | KAIN |  |  |
|  | KNG1 |  |  |
|  | LCAT |  |  |
|  | LUM |  |  |
|  | MBL2 |  |  |
|  | PEDF |  |  |
|  | PGRP2 |  |  |
|  | PHLD |  |  |
|  | PLMN |  |  |
|  | PON1 |  |  |
|  | PROP |  |  |
|  | PROS |  |  |
|  | RET4 |  |  |
|  | SAA1 |  |  |
|  | SAA4 |  |  |
|  | SAMP |  |  |
|  | SHBG |  |  |
|  | S10A8 |  |  |
|  | S10A9 |  |  |
|  | TETN |  |  |
|  | THBG |  |  |
|  | THRB |  |  |
|  | TRFE |  |  |
|  | TTHY |  |  |
|  | VTDB |  |  |
|  | VTNC |  |  |
|  | ZA2G |  |  |
